# Supplementary material for: Mediating Role of OCT-Defined Vulnerable Plaque in the Association of Atherogenic Index of Plasma with Adverse Acute Coronary Syndrome Outcomes
Source: Research Square preprint supplement (doi:10.21203/rs.3.rs-7494287/v1), 2025-10-15
Supplement: Supplementary file 1 [file 57209f34bab70841a4f985a3.docx]

**Supplemental Digital Content**

**Supplemental Methods. OCT quantitative date definitions**

Minimum luminal area (MLA), defined as the cross-sectional area at the level of the smallest lumen diameter. Proximal reference luminal area, defined as the cross-sectional area at the frame with the largest lumen within 10 mm proximal to the MLA and before any major side branch. Distal reference luminal area, defined as the cross-sectional area at the frame with the largest lumen within 10 mm distal to the MLA and before any major side branch. Lesion length, defined as the longitudinal distance between a significantly narrowed or abnormal area in the vessel lumen and the normal area of the vessel lumen.

**OCT qualitative definitions and measurements**

Thin-cap fibroatheroma (TCFA): Defined as a fibrous cap with thickness <65 μm overlying a lipid-rich necrotic core, accompanied by a lipid arc >180°; Cholesterol crystals appeared as thin, linear, high-intensity regions usually attached to fibrous caps or necrotic cores. Thrombus was identified as a mass located on the luminal surface or floating within the lumen. Plaque rupture was characterized by intimal tearing, disruption, or dissection of the fibrous cap. Calcified plaque appeared as a poorly defined signal or a heterogeneous region with a sharply defined border. Macrophage infiltration presented as rich signals in distinct or confluent punctateregions, exceeding the intensity of background speckle noise. Microvessels were identified as signal-poor, circular structures with a diameter<250 μm, observed in more than three consecutive cross-sectional OCT images. Fibrous plaque exhibited high backscattering and a relatively homogeneous signal. Lipid plaques are atherosclerotic plaques primarily composed of lipids and necrotic tissue, typically exhibiting low backscattering signal regions and may be covered by a fibrous cap. In our study, the median value of the lipidic plaque burden and the minimal value of the fibrous cap thickness over five consecutive image frames were used to compute the LCR for each OCT image frame. The maximum LCR over the entire OCT pullback was used as vessel LCR for statistical analysis.

The definitions of basic measurements are as follows:

Thickness: the thickest distance between the inner and outer border of the plaque component (valid only if the deep boundary can be identified).

Area: the cross-sectional area of the plaque component (valid only if the deep boundary can be identified).

Volume: the sum of areas of each cross-section multiplied by the slice thickness over the segment of interest (Simpson rule). Cap thickness: the thickness of a cap present over calcium or lipid. Minimum fibrous cap thickness is conventionally measured three times at the thinnest point in magnified views, and the average value is calculated. Lesion length: the distance between the proximal and distal reference. Length measurements can be obtained in OCT data sets that are acquired using automated pullback. The slice thickness (image spacing) in millimetres is the pullback rate (millimetresper second) divided by the frame rate (per second).

**Supplementary Table 1 Medication Use in Study Participants**

|  | Total (n = 1324) | Non-MACE (n = 1118) | MACE (n = 206) | *P* |
| --- | --- | --- | --- | --- |
| Aspirin/Indobufen, n(%) | 1285 (97.05) | 1083 (96.87) | 202 (98.06) | 0.354 |
| Clopidogrel/Ticagrelor, n(%) | 1308 (98.79) | 1105 (98.84) | 203 (98.54) | 0.994 |
| Statins, n(%) | 1302 (98.34) | 1101 (98.48) | 201 (97.57) | 0.523 |
| PCSK9 Inhibitors, n(%) | 268 (20.24) | 230 (20.57) | 38 (18.45) | 0.485 |
| SGLT2 Inhibitors, n(%) | 228 (17.22) | 187 (16.73) | 41 (19.90) | 0.267 |
| Beta-blockers, n(%) | 1018 (76.89) | 853 (76.30) | 165 (80.10) | 0.234 |
| ACEI/ARB/ARNI, n(%) | 971 (73.34) | 819 (73.26) | 152 (73.79) | 0.874 |
| Ezetimibe, n(%) | 240 (18.13) | 203 (18.16) | 37 (17.96) | 0.946 |
| CCB, n(%) | 159 (12.01) | 133 (11.90) | 26 (12.62) | 0.769 |
| Nicorandil, n(%) | 547 (41.31) | 463 (41.41) | 84 (40.78) | 0.865 |

MACE: major adverse cardiovascular events; ACEI: angiotensin-converting enzyme inhibitor; ARB: angiotensin receptor blocker; ARNI: angiotensin receptor–neprilysin inhibitor; CCB: calcium channel blocker; SGLT-2: sodium-glucose cotransporter 2; PCSK9: Proprotein Convertase Subtilisin/Kexin Type 9.

Supplementary Figure 1. Kaplan-Meier Curves of Secondary outcomes for the AIP.

AIP: Atherogenic Index of Plasma, ISR: In-stent restenosis, HF: Chronic heart failure.

Supplementary Figure 2. Kaplan-Meier Curves of Secondary outcomes for the LCR.

LCR: Lipid-to-cap Ratio, ISR: In-stent restenosis, HF: Chronic heart failure.

Supplementary Figure 3. Kaplan-Meier Curves of Secondary outcomes for TCFA.

TCFA: Thin-Cap Fibroatheroma, ISR: In-stent restenosis, HF: Chronic heart failure.

Supplementary Figure 4. Kaplan-Meier Curves of Secondary outcomes for Cholesterol crystals.

ISR: In-stent restenosis, HF: Chronic heart failure.

Supplementary Figure 5. Kaplan-Meier Curves of Secondary outcomes for Macrophage infiltration.

ISR: In-stent restenosis, HF: Chronic heart failure.
